# Supplementary material
Source: Springer Nature journal article supplement (https://www.springermedizin.de/resource/supplementary/12958_2009_596_MOESM6_ESM.pdf/9568058)

**A****TNF- $\alpha$** 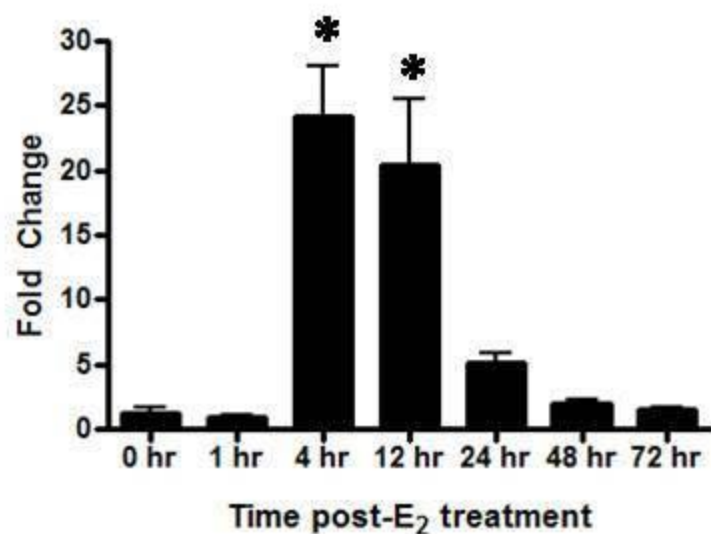**MCP 1**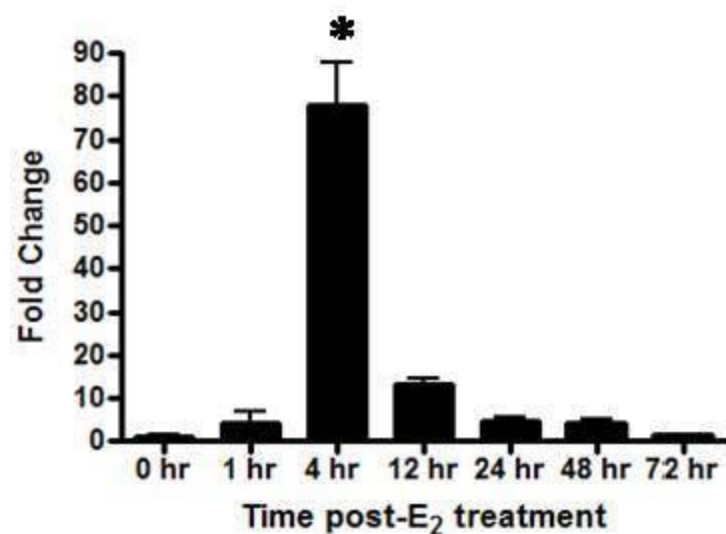**B****TNF- $\alpha$** 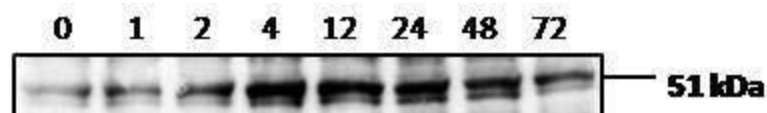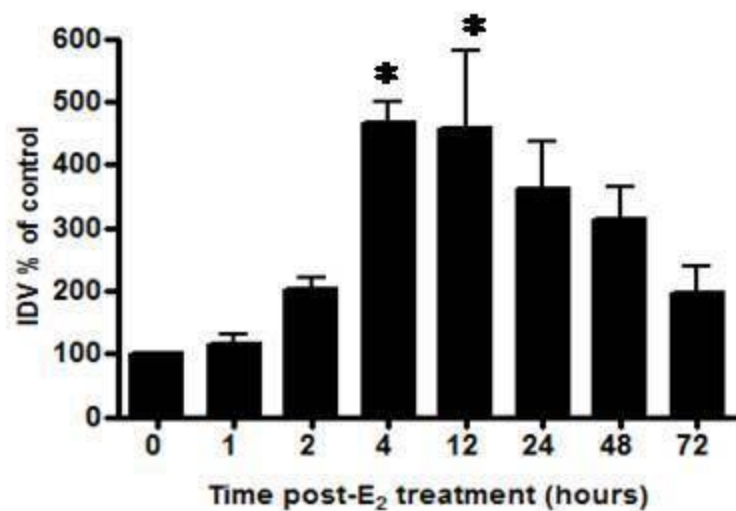**MCP 1**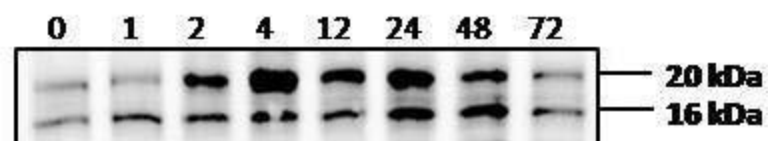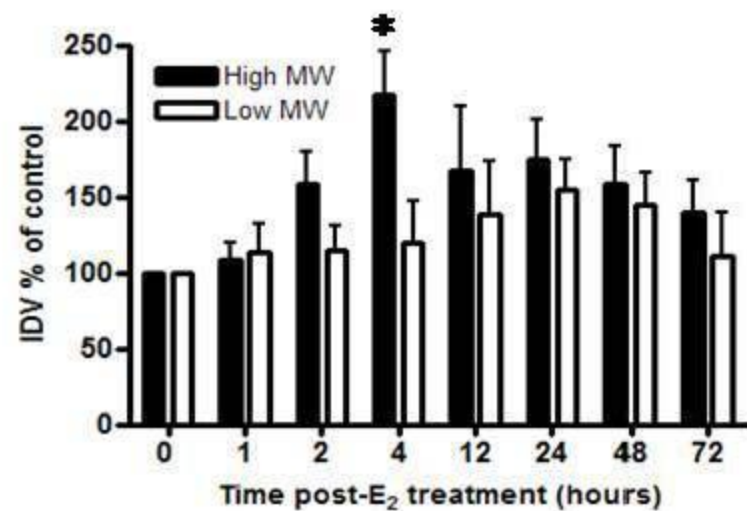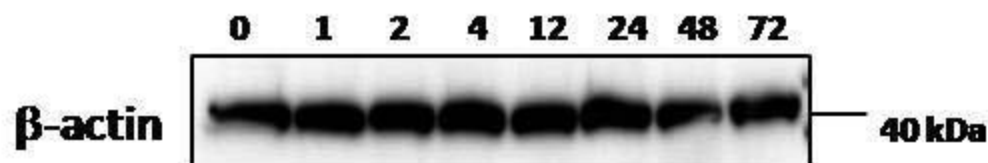

Supplement: MOESM6 [file 9568058]
